# Supplementary material for: Melt-induced fluorescent signature in a simple naphthalenediimide
Source: Royal Society of Chemistry journal article supplement (doi:10.1039/c0cc00865f), 2010-01-01

## Supplementary Information

# Melt-Induced Fluorescent Signature in a Simple Naphthalenediimide

Toby D. M. Bell,<sup>a,b</sup> Sheshanath V. Bhosale,<sup>a</sup> Craig M. Forsyth,<sup>a</sup> David Hayne,<sup>b</sup> Kenneth P. Ghiggino,<sup>b\*</sup> James A. Hutchinson,<sup>b,c</sup> Chintan H. Jani,<sup>a</sup> Steven J. Langford,<sup>a\*</sup> Marcia A.-P. Lee<sup>a</sup> and Clint P. Woodward<sup>a</sup>

### S1: <sup>1</sup>H NMR Spectra of **2**

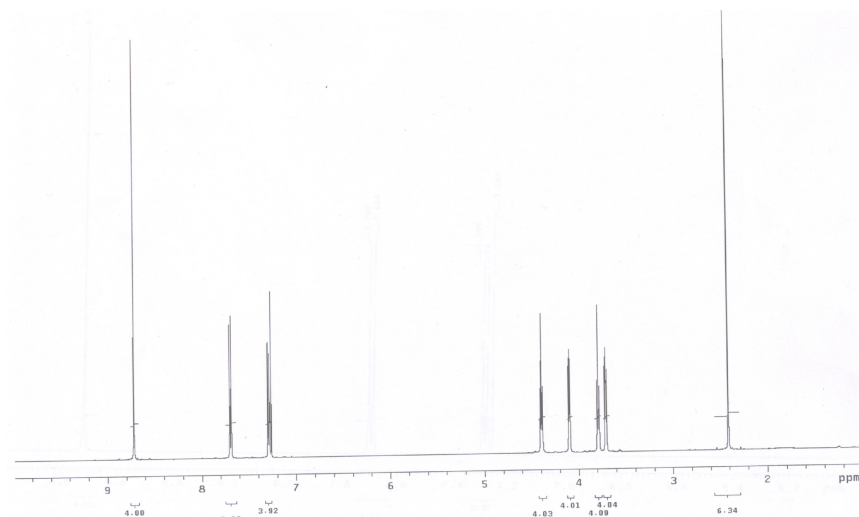

### S2: <sup>13</sup>C NMR Spectra of **2**

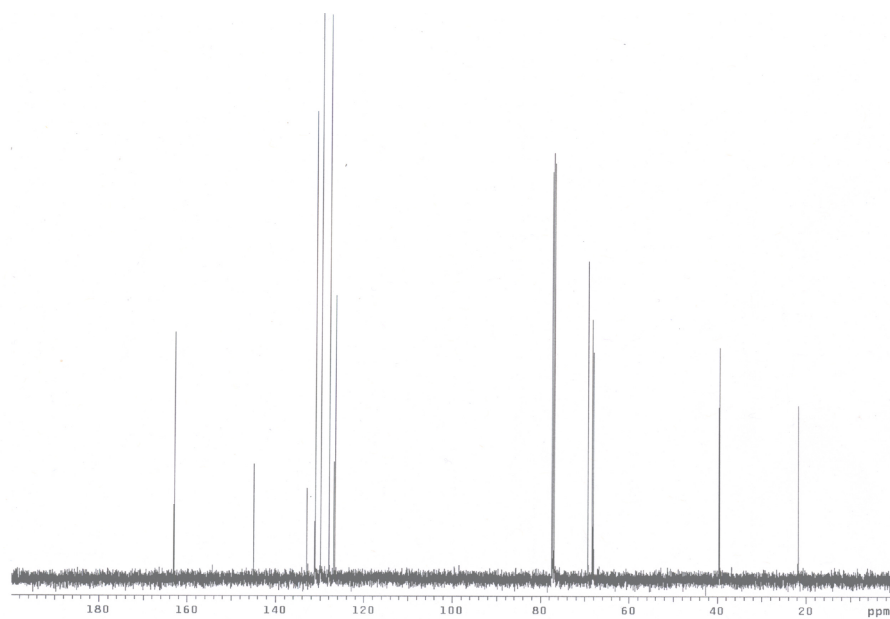

### S3: Macromolecular structure of **2**

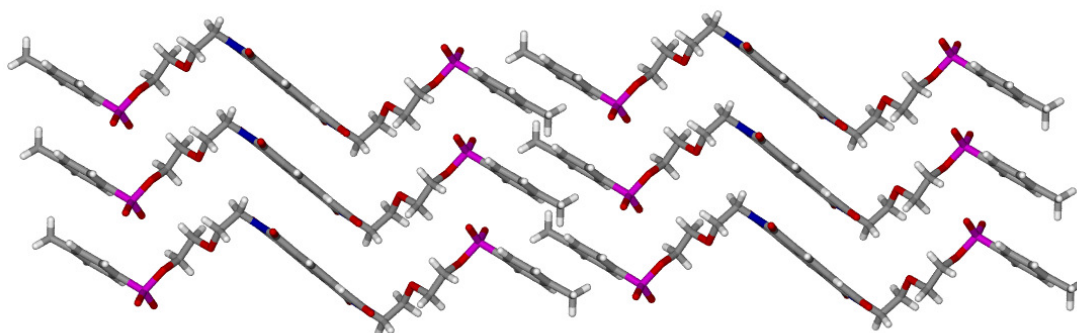

### S4: XRD of **1** with DSC inset

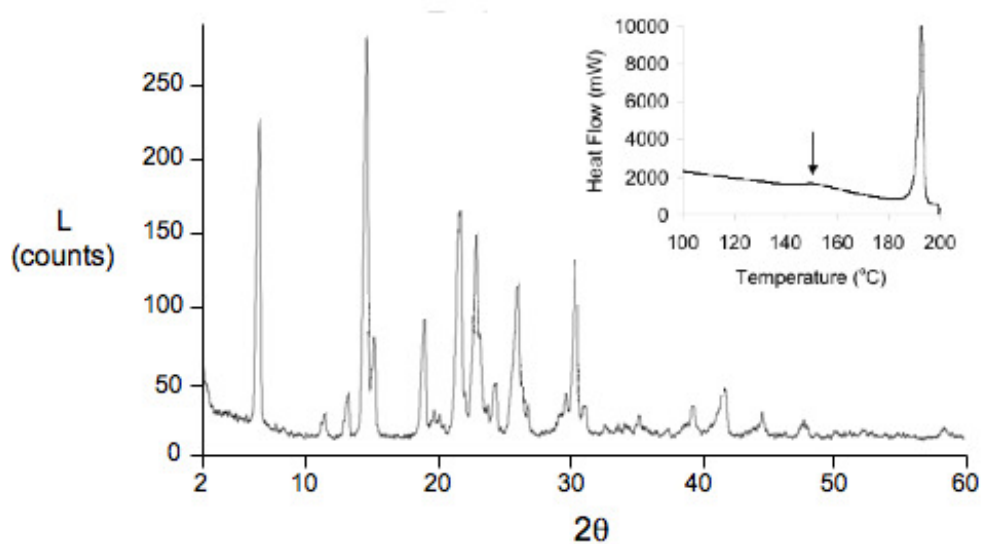

### S5: X-ray structure of **1**

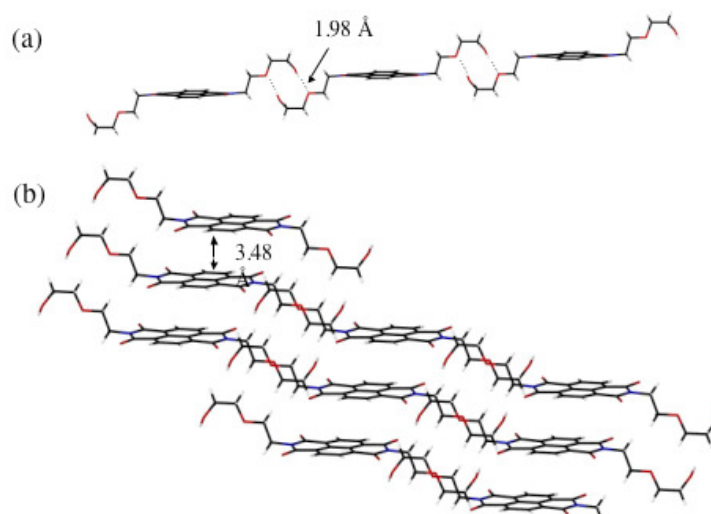

(a) hydrogen bonding tapes in single layer and (b) aromatic stabilisation between layers.

S6: Fluorescence spectra of **1** as crystal and melt

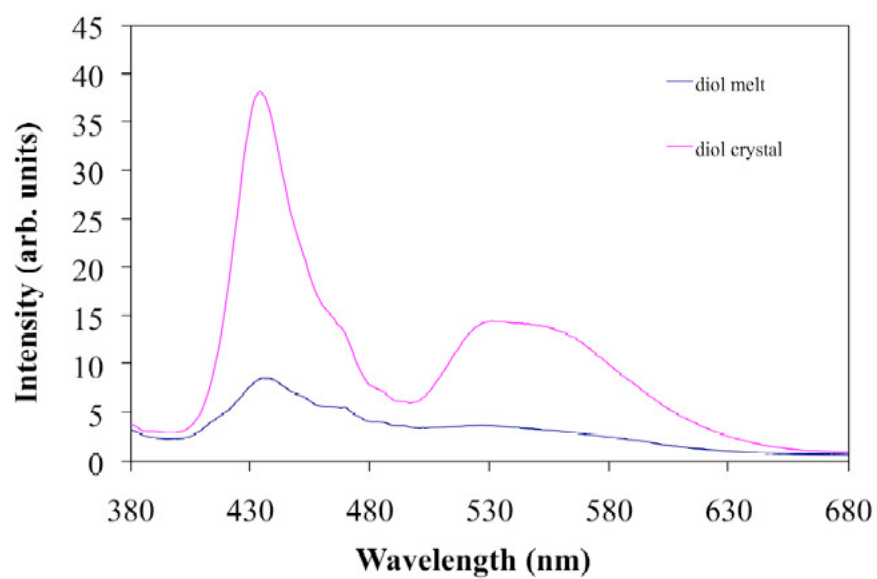

Supplement: c0cc00865f.pdf [file c0cc00865f.pdf]
